# Supplementary material
Source: Springer Nature journal article supplement (https://www.springermedizin.de/resource/supplementary/12890_2013_536_MOESM3_ESM.pdf/9505724)

**a**Airway mucosal  
injury (HCl, i.t.)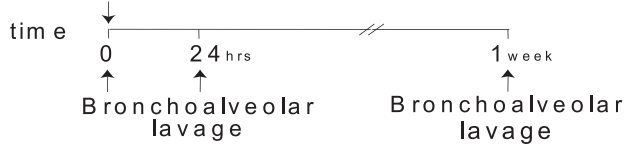**b**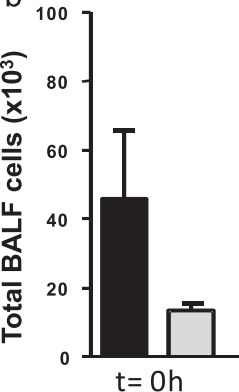**c**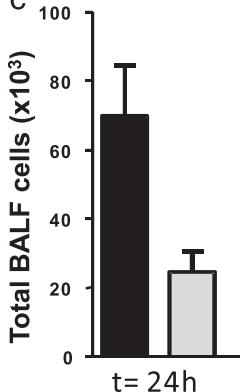**d**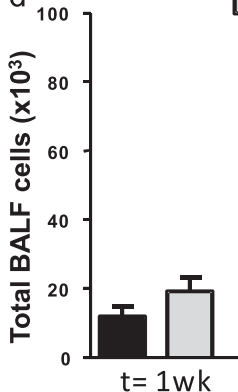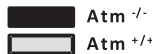 $n \geq 4$

Supplement: MOESM3 [file 9505724]
